# Supplementary material for: Direct Recovery of the Rare Earth Elements Using a Silk Displaying a Metal-Recognizing Peptide
Source: MDPI journal article supplement (doi:10.3390/molecules25030761), 2020-02-10
Supplement: s1 [file s1]

## Supplementary Materials

### Direct Recovery of the Rare Earth Elements Using a Silk

#### Displaying a Metal-Recognizing Peptide

Nobuhiro Ishida <sup>1</sup>, Takaaki Hatanaka <sup>1</sup>, Yoichi Hosokawa <sup>1</sup>, Katsura Kojima <sup>2</sup>, Tetsuya Iizuka <sup>3</sup>, Hidetoshi Teramoto <sup>2</sup>, Hideki Sezutsu <sup>3</sup> and Tsunenori Kameda <sup>2,\*</sup>

- <sup>1</sup> Strategic Research Division, TOYOTA Central R&D Labs, Inc., 41-1, Yokomichi, Nagakute, Aichi 480-1192, Japan.
- <sup>2</sup> Silk Materials Research Unit, Division of Biotechnology, Institute of Agrobiological Sciences, National Agriculture and Food Research Organization (NARO), 1-2, Owashi, Tsukuba, Ibaraki 305-8634, Japan.
- <sup>3</sup> Transgenic Silkworm Research Unit, Division of Biotechnology, Institute of Agrobiological Sciences, National Agriculture and Food Research Organization (NARO), 1-2, Owashi, Tsukuba, Ibaraki, 305-8634, Japan.

\*Address correspondence to: Silk Materials Research Unit, Division of Biotechnology, Institute of Agrobiological Sciences, National Agriculture and Food Research Organization (NARO), 1-2, Owashi, Tsukuba, Ibaraki 305-8634, Japan..

Dr. Tsunenori Kameda

E-mail: kamedat@affrc.go.jp

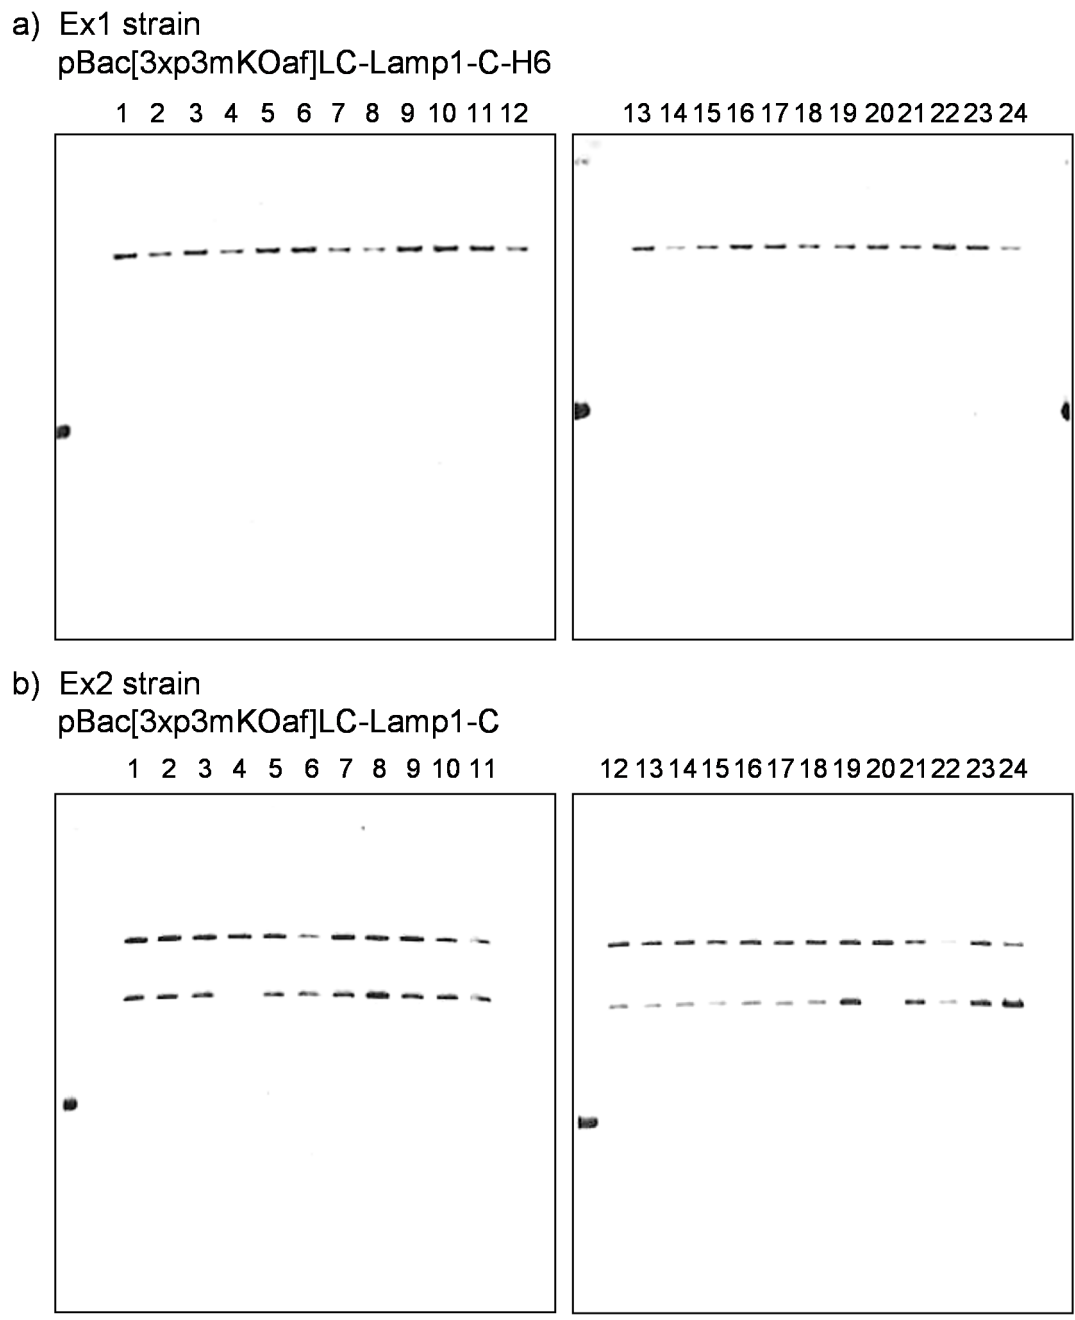

**Supplementary Figure S1: Genomic Southern blot analysis of transgenic silkworms**

The Probe DNA used here was the same as we reported previously (Kojima et al. (2007) A new method for the modification of fibroin heavy chain protein in the transgenic silkworm. *Biosci. Biotechnol. Biochem.* 71: 2943–2951).

a) Ex1 strain

pBac[3xp3mKOaf]LC-Lamp1-C-H6

|                                 |                                 |                     |    |
|---------------------------------|---------------------------------|---------------------|----|
| aag ggt ggt gga tct ggc ggc ggt | tct tgt tta tgg gga gac gta tca | 48                  |    |
| Lys Gly Gly Gly Ser Gly Gly Gly | Ser Cys Leu Trp Gly Asp Val Ser |                     |    |
| 1                               | 5                               | 10                  |    |
| 15                              |                                 |                     |    |
|                                 |                                 |                     |    |
| gaa ctg gac ttc tta tgc tcc     | ggc ggc ggt tca                 | cat cac cac cat cac | 96 |
| Glu Leu Asp Phe Leu Cys Ser     | Gly Gly Gly Ser                 | His His His His His |    |
| 20                              | 25                              | 30                  |    |
|                                 |                                 |                     |    |
| cac tga                         |                                 | 102                 |    |
| His                             |                                 |                     |    |

b) Ex2 strain

pBac[3xp3mKOaf]LC-Lamp1-C

|                                 |                                 |    |
|---------------------------------|---------------------------------|----|
| aag gga ggc ggc tca ggg ggg ggt | tcg tgt tta tgg gga gac gta tca | 48 |
| Lys Gly Gly Gly Ser Gly Gly Gly | Ser Cys Leu Trp Gly Asp Val Ser |    |
| 1                               | 5                               | 10 |
| 15                              |                                 |    |
|                                 |                                 |    |
| gag ctc gac ttc tta tgc tcg     | tag                             | 72 |
| Glu Leu Asp Phe Leu Cys Ser     |                                 |    |
| 20                              |                                 |    |

**Supplementary Figure S2: DNA (upper) and amino acid (lower) sequence of the Lamp1 insert fragment**

Sequence of insert fragment for vector construction. The yellow part indicates the linker and the green part indicates Lamp1.
